# Supplementary material for: Human-nature relationships in context. Experiential, psychological, and contextual dimensions that shape children’s desire to protect nature
Source: PLOS journal article supplement (doi:10.1371/journal.pone.0225951), 2019-12-05
Supplement: S2 (10.1371/journal.pone.0225951.s002) [file journal.pone.0225951.s002]

## **S2 Appendix. Booklet used for assessment (English).**

Translation in English of the booklet used in this study to assess children's psychological and contextual dimensions of HNC.

# You, Nature, and Home

Name

---

Class

---

How much do you agree with the following statements? Cross a box

| statements                                                           | Agree very much          | Agree                    | Neither agree nor disagree | Disagree                 | Disagree very much       |
|----------------------------------------------------------------------|--------------------------|--------------------------|----------------------------|--------------------------|--------------------------|
| I like to hear different sounds in nature                            | <input type="checkbox"/> | <input type="checkbox"/> | <input type="checkbox"/>   | <input type="checkbox"/> | <input type="checkbox"/> |
| I like to see wild flowers in nature                                 | <input type="checkbox"/> | <input type="checkbox"/> | <input type="checkbox"/>   | <input type="checkbox"/> | <input type="checkbox"/> |
| When I feel sad, I like to go outside and enjoy nature               | <input type="checkbox"/> | <input type="checkbox"/> | <input type="checkbox"/>   | <input type="checkbox"/> | <input type="checkbox"/> |
| I feel calm when I am out in nature                                  | <input type="checkbox"/> | <input type="checkbox"/> | <input type="checkbox"/>   | <input type="checkbox"/> | <input type="checkbox"/> |
| I enjoy working in the garden                                        | <input type="checkbox"/> | <input type="checkbox"/> | <input type="checkbox"/>   | <input type="checkbox"/> | <input type="checkbox"/> |
| Collecting rocks and shells is fun (for example stones and feathers) | <input type="checkbox"/> | <input type="checkbox"/> | <input type="checkbox"/>   | <input type="checkbox"/> | <input type="checkbox"/> |
| I feel sad when wild animals are hurt                                | <input type="checkbox"/> | <input type="checkbox"/> | <input type="checkbox"/>   | <input type="checkbox"/> | <input type="checkbox"/> |
| I like to see wild animals live in a clean environment               | <input type="checkbox"/> | <input type="checkbox"/> | <input type="checkbox"/>   | <input type="checkbox"/> | <input type="checkbox"/> |
| I like to touch animals and plants                                   | <input type="checkbox"/> | <input type="checkbox"/> | <input type="checkbox"/>   | <input type="checkbox"/> | <input type="checkbox"/> |
| I think it's important to take care of animals                       | <input type="checkbox"/> | <input type="checkbox"/> | <input type="checkbox"/>   | <input type="checkbox"/> | <input type="checkbox"/> |
| People are part of nature                                            | <input type="checkbox"/> | <input type="checkbox"/> | <input type="checkbox"/>   | <input type="checkbox"/> | <input type="checkbox"/> |
| People cannot live without plants and animals                        | <input type="checkbox"/> | <input type="checkbox"/> | <input type="checkbox"/>   | <input type="checkbox"/> | <input type="checkbox"/> |
| Being outdoors makes me happy                                        | <input type="checkbox"/> | <input type="checkbox"/> | <input type="checkbox"/>   | <input type="checkbox"/> | <input type="checkbox"/> |
| My actions will affect nature                                        | <input type="checkbox"/> | <input type="checkbox"/> | <input type="checkbox"/>   | <input type="checkbox"/> | <input type="checkbox"/> |
| Picking up trash on the ground can help the environment              | <input type="checkbox"/> | <input type="checkbox"/> | <input type="checkbox"/>   | <input type="checkbox"/> | <input type="checkbox"/> |
| People do not have the right to change nature                        | <input type="checkbox"/> | <input type="checkbox"/> | <input type="checkbox"/>   | <input type="checkbox"/> | <input type="checkbox"/> |

How much do you agree with the following statements? Cross a box

|                                                       | Agree very much          | Agree                    | Neither agree nor disagree | Disagree                 | Disagree very much       |
|-------------------------------------------------------|--------------------------|--------------------------|----------------------------|--------------------------|--------------------------|
| I feel sad when salamanders get injured               | <input type="checkbox"/> | <input type="checkbox"/> | <input type="checkbox"/>   | <input type="checkbox"/> | <input type="checkbox"/> |
| I like to see salamanders live in a clean environment | <input type="checkbox"/> | <input type="checkbox"/> | <input type="checkbox"/>   | <input type="checkbox"/> | <input type="checkbox"/> |
| I like to touch salamanders                           | <input type="checkbox"/> | <input type="checkbox"/> | <input type="checkbox"/>   | <input type="checkbox"/> | <input type="checkbox"/> |
| I think it's important to take care of salamanders    | <input type="checkbox"/> | <input type="checkbox"/> | <input type="checkbox"/>   | <input type="checkbox"/> | <input type="checkbox"/> |

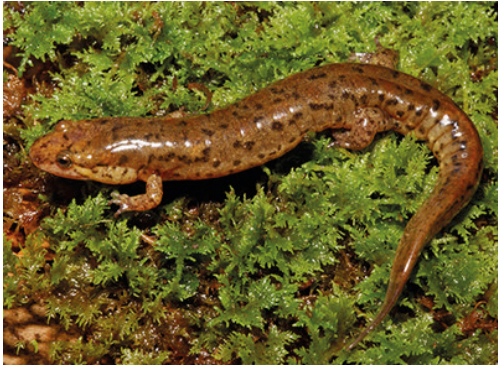

Would you like to work for nature or environmental projects in the future?

\_\_\_\_\_

\_\_\_\_\_

Circle the letter that best describes the relationship between home and nature

|    |  |
|----|--|
| a. |  |
| b. |  |
| c. |  |
| d. |  |
| e. |  |
| f. |  |
| g. |  |

Circle the letter that best describes the relationship between home and city

|    |                                                                                     |
|----|-------------------------------------------------------------------------------------|
| a. | 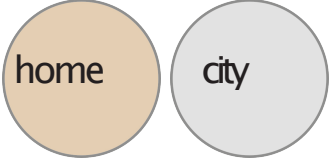   |
| b. |    |
| c. |    |
| d. |    |
| e. |   |
| f. |  |
| g. |  |

What does the city mean to you?

---

---

What is best about the city?

---

---

What is worst about the city?

---

---

What does nature mean to you ?

---

---

What is best about nature?

---

---

What is worst about nature?

---

---

What does home mean to you ?

---

---

What is best about home?

---

---

What is worst about home?

---

---

Circle the letter that best describes the relationship between **you** and **nature**

|    |                                                                                     |
|----|-------------------------------------------------------------------------------------|
| a. | 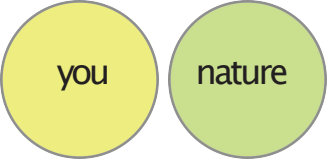   |
| b. |    |
| c. |    |
| d. |    |
| e. |  |
| f. |  |
| g. |  |

Circle the letter that best describes the relationship between **you** and **city**

|    |                                                                                       |
|----|---------------------------------------------------------------------------------------|
| a. | 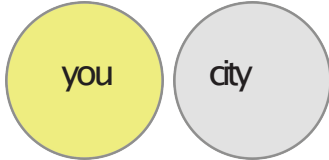   |
| b. |    |
| c. |    |
| d. |    |
| e. |   |
| f. |  |
| g. |  |
